# Supplementary material for: Chondroitin-analogue decorated magnetic nanoparticles via a click reaction for selective adsorption of low-density lipoprotein
Source: Royal Society of Chemistry journal article supplement (doi:10.1039/c9py00088g), 2019-01-01
Supplement: c9py00088g1.pdf [file c9py00088g1.pdf]

Supplementary Information for:

**Chondroitin-analogue decorated magnetic nanoparticle *via* click  
reaction for selective adsorption of low-density lipoprotein**

Kai Cheng<sup>a</sup>, Yichen Li<sup>a</sup>, Huijuan Cai<sup>a</sup>, Xinyuan Xu<sup>a</sup>, Weifeng Zhao<sup>a,b</sup>,

Dongyue Zhang<sup>\*a,b</sup>, Changsheng Zhao<sup>a,b</sup>, Jianshu Li<sup>\*a,b</sup>

<sup>a</sup> College of Polymer Science and Engineering, Sichuan University, Chengdu, 610065, China.

<sup>b</sup> State Key Laboratory of Polymer Materials Engineering, Sichuan University, Chengdu, 610065,  
China.

E-mail: jianshu\_li@scu.edu.cn; Tel: +86 28 85466755

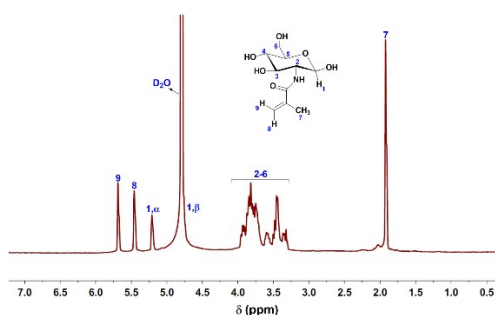

Figure S1. <sup>1</sup>H NMR spectra of synthesized saccharide monomer MAG.

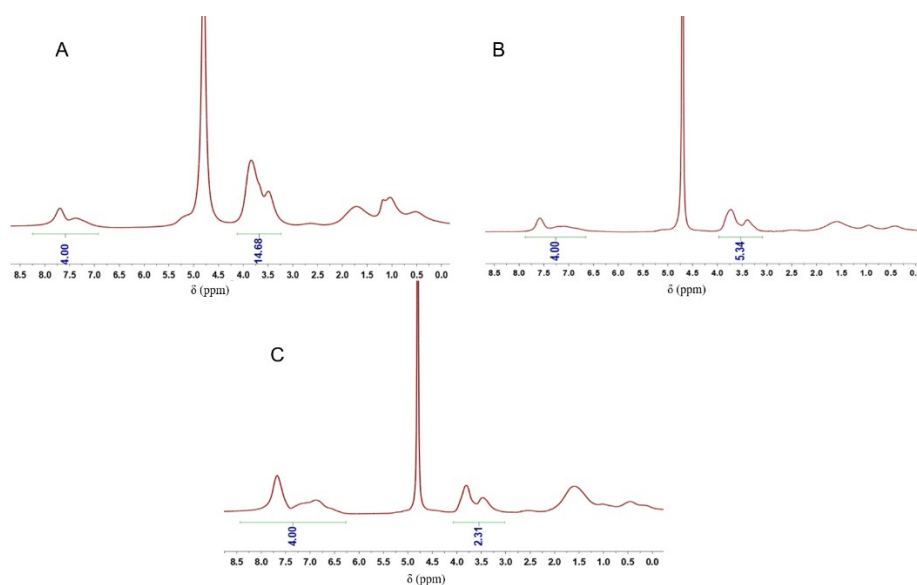

Figure S2. <sup>1</sup>H NMR spectra of CS-analogue polymers PM<sub>2</sub>S<sub>1</sub> (A), PM<sub>1</sub>S<sub>1</sub> (B) and PM<sub>1</sub>S<sub>2</sub> (C).

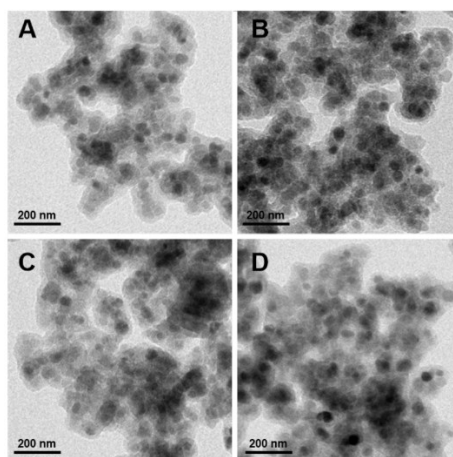

**Figure S3.** TEM images of  $\text{Fe}_3\text{O}_4$ -MAG (A),  $\text{Fe}_3\text{O}_4$ - $\text{PM}_2\text{S}_1$  (B),  $\text{Fe}_3\text{O}_4$ - $\text{PM}_1\text{S}_2$  (C) and  $\text{Fe}_3\text{O}_4$ -PSS (D).

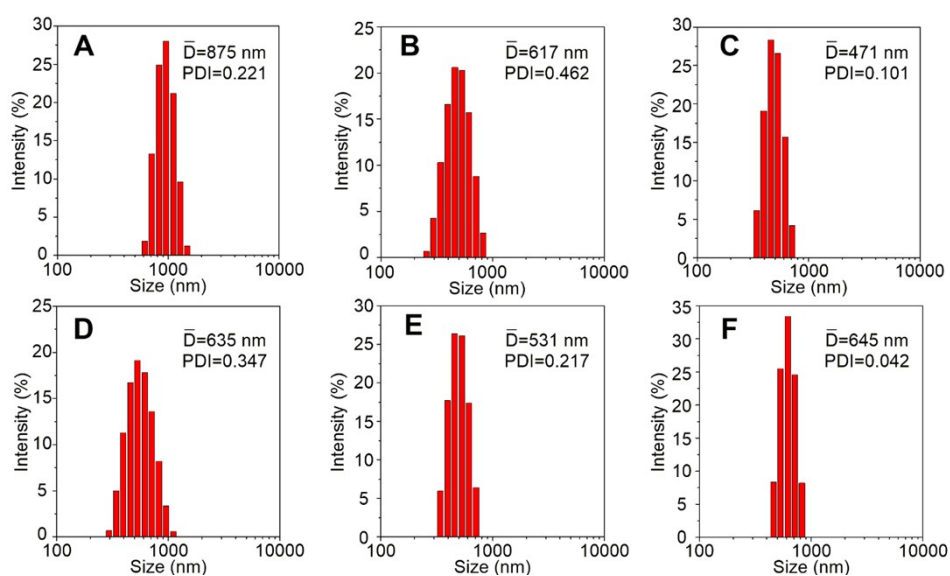

**Figure S4.** DLS histogram of  $\text{Fe}_3\text{O}_4$ -C≡CH (A),  $\text{Fe}_3\text{O}_4$ -MAG (B),  $\text{Fe}_3\text{O}_4$ - $\text{PM}_2\text{S}_1$  (C),  $\text{Fe}_3\text{O}_4$ - $\text{PM}_1\text{S}_1$  (D),  $\text{Fe}_3\text{O}_4$ - $\text{PM}_1\text{S}_2$  (E) and  $\text{Fe}_3\text{O}_4$ -PSS (F).

**Table S1.** Elemental analysis (EA) data of CS-analogue polymers synthesized via ATRP.

| sample                  | $N_{\text{test}}$ (%) <sup>a</sup> | $N_{\text{theo}}$ (%) <sup>b</sup> | C (%)  | H (%) | $S_{\text{test}}$ (%) <sup>a</sup> | $S_{\text{theo}}$ (%) <sup>b</sup> |
|-------------------------|------------------------------------|------------------------------------|--------|-------|------------------------------------|------------------------------------|
| PMAG                    | 4.925                              | 5.668                              | 38.712 | 5.620 | 0.075                              | —                                  |
| $\text{PM}_2\text{S}_1$ | 3.960                              | 3.999                              | 38.211 | 6.571 | 4.012                              | 4.571                              |
| $\text{PM}_1\text{S}_1$ | 3.144                              | 3.091                              | 39.614 | 7.221 | 6.896                              | 7.061                              |
| $\text{PM}_1\text{S}_2$ | 2.126                              | 2.123                              | 39.378 | 5.253 | 9.216                              | 9.706                              |
| PSS                     | 0.039                              | —                                  | 37.389 | 4.923 | 14.869                             | 15.520                             |

<sup>a</sup> measured by EA. <sup>b</sup>  $N_{\text{theo}}$  and  $S_{\text{theo}}$  meant theoretical values of N and S content, calculated as follows:

$$N_{\text{theo}}(\%) = \frac{14x}{247x + 206y} \times 100\% \quad , \quad S_{\text{theo}}(\%) = \frac{32y}{247x + 206y} \times 100\%$$

, 14, 32, 247 and 206 represented the molecular weight of N, S, MAG and SS, respectively.

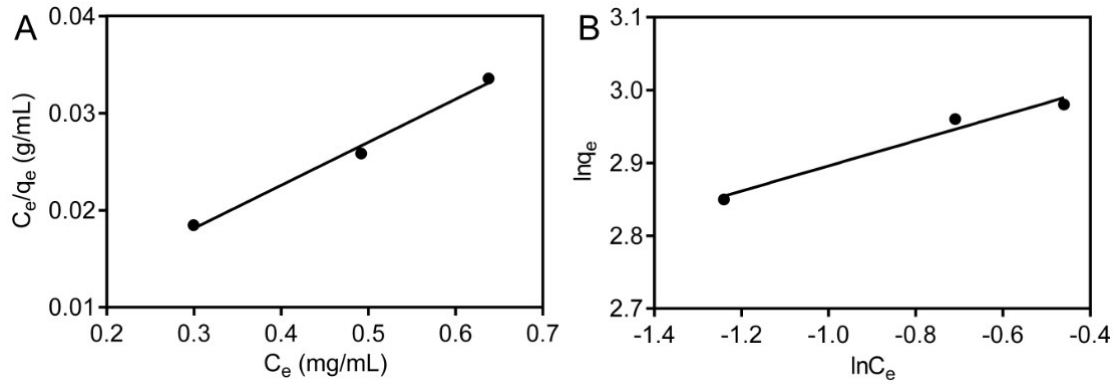

**Figure S5.** Langmuir adsorption isotherm and Freundlich adsorption isotherm of BSA for MNPs decorated with  $\text{PM}_1\text{S}_1$ . The initial BSA concentration in solution was set as 500, 750 and 1000  $\mu\text{g}/\text{mL}$ .

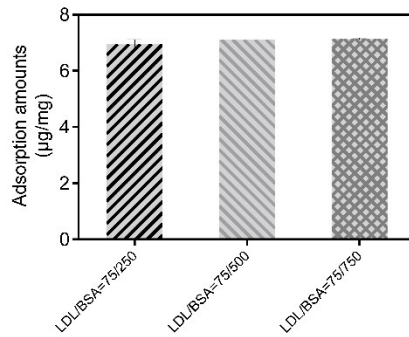

**Figure S6.** LDL adsorption amounts of  $\text{Fe}_3\text{O}_4\text{-PM}_1\text{S}_1$  in different BSA concentration.

**Table S2.** The parameters of Langmuir isotherms and Freundlich isotherm for BSA adsorption by  $\text{Fe}_3\text{O}_4\text{-PM}_1\text{S}_1$ .

| Langmuir isotherms | $q_{\text{max}}$ (mg/g) | $K_L$ | $r_L^2$ | Freundlich isotherm | $n$   | $K_F$ | $r_F^2$ |
|--------------------|-------------------------|-------|---------|---------------------|-------|-------|---------|
|                    | 19.598                  | 1.09  | 0.992   |                     | 5.780 | 3.096 | 0.969   |
